# Supplementary material
Source: PubMed Central journal article supplement (PMC4264930)
Supplement: embr0015-1278-sd1.pdf [file embr0015-1278-sd1.pdf]

Supplementary Figure S1 Kosmaczewski et al.

E.coli|NP\_417879.1 1 -----MNY-----EL--LTTENAPVKMWTKGVPEADARQOLINTAKMPFIFKHIAVMPDVHLGKGS  
P.horikoshii|pdb1UC2|A 1 -----MNVFIRKRIDKIRWEIP-KFDKMRVVEGRVYADEVLEKMKND-----RTLEOATNVAMLPGIYKYSTVMPDGHQGYGF  
C.elegans|NP\_492498.1 1 -MPRTFEEECDFIDRLTDTKFRIKKGFVPMNVEGRFVYVNSLEQLMFDLKFSCDGOIGGGFLPAVROIANVASLPGIVGHSIGLVDIHSYGYF  
C.reinhardtii|XP\_001699521.1 1 -----MHVPGTFYVNDALKGLMFEELQOAVVRGDHGGFLPAVKQLANVAALPGIVKRSIALPDVHSGYGF  
H.sapiens|AAH00151.1 1 -MSRSYNDLEQLFKINKNCWRIKKGFPNMOVGVFYVNDALKGLMFEELRNA CRGGVGGFLPAMKQIGNVAALPGIVHRSIGLVDVHSGYGF  
M.musculus|NP\_663397.1 1 -MSRNYNDEQLFKINKNCWRIKKGFPNMOVGVFYVNDALKGLMFEELRNA CRGGVGGFLPAMKQIGNVAALPGIVHRSIGLVDVHSGYGF  
D.melanogaster|NP\_609965.1 1 MVVVRPYNDELRLYLEKVS DHCWRIKKGFPNMOVGVFYVNSRLERLMLTEELKNSCRPGA VGGFLPQVQI ANVAALPGIVHRSIGLVDIHSYGYF

E.coli|NP\_417879.1 56 TIGSVIP-----TKGAIIPAAVGVDIGCGMNA LRTALTAEDLPENLAELROAIETAVPHGRRTTGCRCKRDKGAWENPPVNVDAKWAEL EAGYOWLT  
P.horikoshii|pdb1UC2|A 73 PIGGVAADFVK--EGVISPPGGIGVDINCGVRLIRTNLTEKEVVRPRIKQLVDTLFFKNVPSGVGSGRITKLHWTQIDDLVDCAKWA--VDNGYGWER  
C.elegans|NP\_492498.1 95 SIGNIAAFDVGNPESVLSPPGGVGF D INCGVRLRLTNLFEENVKPLKEQLTQSLFDHIPVGVGSRGATPMLASDLVECELEMGMDWT--LREGYSWAE  
C.reinhardtii|XP\_001699521.1 66 AIGNVAADFMDNPEAVVSPGGVGF D INCGVRLRLTNLFEAEVGPVREQLAQLFDHIPVGVGSGTIPTAKDMESALEMGMDWS--LREGYAWAE  
H.sapiens|AAH00151.1 95 AIGNMAADFMDNPEAVVSPGGVGF D INCGVRLRLTNLDES DVOPVKEQLAQLAAMFDHIPVGVGSKGVIIPMNAKDLEEALEMGV DWS--LREGYAWAE  
M.musculus|NP\_663397.1 95 AIGNMAADFMDNPEAVVSPGGVGF D INCGVRLRLTNLDES DVOPVKEQLAQLAAMFDHIPVGVGSKGVIIPMNAKDLEEALEMGV DWS--LREGYAWAE  
D.melanogaster|NP\_609965.1 96 AIGNMAADFMDNPELSVVSPPGGVGF D INCGVRLRLTNLYEKDVO PVKEQLAQLS LFDHIPVGVGSKGITIPMNAKDLEEALEMGV DWS--LREGYVWAE

E.coli|NP\_417879.1 146 OK-----YPRFLNT-----NYYKHLGLTGTGNHFIEIC-----LDES DVWIMLHSGSRGIGNAIGTYFIDLAKEMOE  
P.horikoshii|pdb1UC2|A 165 DLERLEEGGRMEGADPEAVSORAKORGAPOLGSLGSGNHFELEVQVVDKTFDPEVAKAYGLF--EGQVVMVHTGSRGLGHQVATDYLIRIMERAIRK  
C.elegans|NP\_492498.1 189 DKEHCEEYGRMLQADASKVSLRAKKRGLPQLGTLGAGNHYAEVQVDEIYDKHAASTMGIDE EGQVVMVHTGSRGLGHQVATD SLVEMEKAMAR  
C.reinhardtii|XP\_001699521.1 160 DKEHCEEYGRMLNADPRYVSSRAKKRGLPQMGTLGAGNHYAEVQVDEIYDVAARRMGIDTPGOVVMVHTGSRGLGHQVATDALVAMEKAMAR  
H.sapiens|AAH00151.1 189 DKEHCEEYGRMLQADPNKVSARAKRGLPQLGTLGAGNHYAEIQVDEIFNEYAAKKMGIDHKGOVVMVHTGSRGLGHQVATDALVAMEKAMKR  
M.musculus|NP\_663397.1 189 DKEHCEEYGRMLQADPNKVSARAKRGLPQLGTLGAGNHYAEIQVDEIFNEYAAKKMGIDHKGOVVMVHTGSRGLGHQVATDALVAMEKAMKR  
D.melanogaster|NP\_609965.1 190 DKEHCEEYGRMLNADPAKVSARAKRGLPQLGTLGAGNHYAEIQVDEIYDKWSASKMGIEEKGOVVMVHTGSRGLGHQVATDALVAMEKAMKR

E.coli|NP\_417879.1 210 TLETLPSPRDLAYFMEGTEYFDDYLKAVAWAQLFASLNRDAMMENVVTLQOSITOKTVROPOTLAMEE--INCHHNYVQKEQHFQ----EEIYVTRK  
P.horikoshii|pdb1UC2|A 259 YRIPWPDRLELVSPFQSEEGORYFSAMKAAANFAWANROMITHWVRESFOEVFKODPEG--DLGMDIYDVVAHNIGKVEEHEVDGKRVKVI VHRK  
C.elegans|NP\_492498.1 284 DGIVVNDKQLACARINSVEGKNYFSGMAAANFAWVNRSCITFCVRNFAQKTFGMSAD---DMDMOVIYDVSHNVAKMEEHVVDGRPRQLCVHRK  
C.reinhardtii|XP\_001699521.1 255 DGIITNDRQLACARINSEEGQAYLKAMSCAANFAWVNRSSMTFLRQAFAKIFKSTPD---DLDMHVYDVSHNIKVEQHCVDGQHRRLLVHRK  
H.sapiens|AAH00151.1 284 DKIIIVNDRQLACARIASPEGODYLKMAAAAGNYAWVNRSSMTFLRQAFAKVFNTTPD---DFDHHVYDVSHNIKVEQHCVDGKERTLLVHRK  
M.musculus|NP\_663397.1 284 DKIIIVNDRQLACARIASPEGODYLKMAAAAGNYAWVNRSSMTFLRQAFAKVFNTTPD---DLDLHHVYDVSHNIKVEQHCVDGKERTLLVHRK  
D.melanogaster|NP\_609965.1 285 DKIIETNDRQLACARINSVEGODYLKMAAANFAWVNRSSMTFLRQAFAKVFNTTPD---DLDMHVYDVSHNIKVENHMDVDGKERKLLVHRK

E.coli|NP\_417879.1 300 GAVSA-----RAGQYGIIPGSMGAKSFIVRGL--GNESESFCSCSHGAGRVMRSRTKAKKLF SVE DQIRATA----HVECRKDAEVIDE  
P.horikoshii|pdb1UC2|A 352 GATRAFPPGHEAVPRLVYRDVGOPVLIIPGSMGTASYILAGTEGAMKETF GSTCHGAGRVLRSKAATRQYRGDRIRQELLNRTIYVRAASMRVVAEE  
C.elegans|NP\_492498.1 376 GATRAFPPHPLIPVDYQLTGQPVLIIGSMGTCSYVLTGTEOGLVETFGTCHGAGRALSRAKSRRTITWDSVIDDLKKKEITSRIASPKLIMEE  
C.reinhardtii|XP\_001699521.1 347 GSTRAFPPHPLIPVDYQLTGQPVLIIGSMGTCSYVLTGTEOGLVETFGTCHGAGRALSRAKSRRNNSRNKLDYQDVLNKLKAGIARVASPKLVMEE  
H.sapiens|AAH00151.1 376 GSTRAFPPHPLIPVDYQLTGQPVLIIGSMGTCSYVLTGTEOGLVETFGTCHGAGRALSRAKSRRNLDYQDVLNKLADMGAIARVASPKLVMEE  
M.musculus|NP\_663397.1 376 GSTRAFPPHPLIPVDYQLTGQPVLIIGSMGTCSYVLTGTEOGLVETFGTCHGAGRALSRAKSRRNLDYQDVLNKLADMGAIARVASPKLVMEE  
D.melanogaster|NP\_609965.1 377 GSTRAFPPHPLIPVDYQLTGQPVLIIGSMGTCSYVLTGTEOGLVETFGTCHGAGRALSRAKSRRNLDYKDVLDKLDQLGAIARVASPKLVMEE

E.coli|NP\_417879.1 376 IPMAYKDIDAVMAAQS--DLVEVIYTLRQVVCVKG  
P.horikoshii|pdb1UC2|A 447 APGAYKNVDNVVQVSEAGIAKLVARMRPIGVAKG  
C.elegans|NP\_492498.1 471 APESYKNVTDVVDTCDAAGISKKAIVKLRPIAVIKG  
C.reinhardtii|XP\_001699521.1 442 APESYKDVSEVVDTCDAQISKKAIVKLRPIAVIKG  
H.sapiens|AAH00151.1 471 APESYKNVTDVVDTCHDAGISKKAIVKLRPIAVIKG  
M.musculus|NP\_663397.1 471 APESYKNVTDVVDTCHDAGISKKAIVKLRPIAVIKG  
D.melanogaster|NP\_609965.1 472 APESYKDVTDVVDTCDAAGISKKCIKMRPIAVIKG

\*
