# Supplementary material
Source: PubMed Central journal article supplement (PMC4264930)
Supplement: embr0015-1278-sd7.pdf [file embr0015-1278-sd7.pdf]

Supplementary Table S1

| total codons | Leu <sup>(CAA)</sup> and Tyr <sup>(GUA)</sup> codons | longest consecutive run of Leu <sup>(CAA)</sup> and Tyr <sup>(GUA)</sup> codons | WB gene        | gene name | transcript name |
|--------------|------------------------------------------------------|---------------------------------------------------------------------------------|----------------|-----------|-----------------|
| 343          | 11                                                   | 5                                                                               | WBGene00015492 | lnp-1     | C05E11.1.1      |
| 343          | 11                                                   | 5                                                                               | WBGene00015492 | lnp-1     | C05E11.1.2      |
| 115          | 10                                                   | 5                                                                               | WBGene00018463 | F45E1.2   | F45E1.2         |
| 90           | 22                                                   | 4                                                                               | WBGene00007233 | C01G10.6  | C01G10.6        |
| 76           | 15                                                   | 4                                                                               | WBGene00044658 | C01G10.17 | C01G10.17       |
| 73           | 14                                                   | 4                                                                               | WBGene00007231 | C01G10.4  | C01G10.4        |
| 506          | 26                                                   | 4                                                                               | WBGene00007210 | agmo-1    | BE10.2          |
| 314          | 17                                                   | 4                                                                               | WBGene00001566 | acdh-13   | C28C12.9b       |
| 618          | 28                                                   | 4                                                                               | WBGene00001566 | acdh-13   | C28C12.9a.1     |
| 300          | 12                                                   | 4                                                                               | WBGene00016538 | C39F7.1   | C39F7.1         |
| 618          | 28                                                   | 4                                                                               | WBGene00001566 | acdh-13   | C28C12.9a.2     |
| 647          | 34                                                   | 4                                                                               | WBGene00016456 | C35E7.4   | C35E7.4         |
| 597          | 28                                                   | 4                                                                               | WBGene00016271 | C30G4.6   | C30G4.6         |
| 347          | 20                                                   | 4                                                                               | WBGene00008128 | srab-12   | C47A10.6        |
| 1164         | 62                                                   | 4                                                                               | WBGene00018134 | F37A4.4   | F37A4.4         |
| 1148         | 35                                                   | 4                                                                               | WBGene00019148 | H03E18.1  | H03E18.1.1      |
| 435          | 16                                                   | 4                                                                               | WBGene00019370 | K03H6.5   | K03H6.5         |
| 1148         | 35                                                   | 4                                                                               | WBGene00019148 | H03E18.1  | H03E18.1.2      |
| 784          | 28                                                   | 4                                                                               | WBGene00019257 | H32C10.3  | H32C10.3        |
| 822          | 18                                                   | 4                                                                               | WBGene00011880 | T21B6.3   | T21B6.3         |
| 1264         | 54                                                   | 4                                                                               | WBGene00004001 | pgp-7     | T21E8.2         |
| 343          | 25                                                   | 4                                                                               | WBGene00005111 | srd-33    | T19H12.4        |

|     |    |   |                |           |             |
|-----|----|---|----------------|-----------|-------------|
| 199 | 10 | 4 | WBGene00004275 | rab-11.2  | W04G5.2a    |
| 882 | 35 | 4 | WBGene00021233 | Y19D10B.4 | Y19D10B.4   |
| 230 | 6  | 4 | WBGene00021891 | Y54G2A.27 | Y54G2A.27.2 |
| 187 | 14 | 4 | WBGene00022655 | srsx-40   | ZK105.4     |
| 230 | 6  | 4 | WBGene00021891 | Y54G2A.27 | Y54G2A.27.1 |
