# Supplementary material
Source: PubMed Central journal article supplement (PMC4264930)
Supplement: embr0015-1278-sd8.pdf [file embr0015-1278-sd8.pdf]

Supplementary Table S2

| Gene         | Control RPKM | Control+Tm RPKM | Control/Control+Tm Log2 Fold Change | RtcB RPKM | RtcB+Tm RPKM | RtcB/RtcB+Tm Log2 Fold Change |
|--------------|--------------|-----------------|-------------------------------------|-----------|--------------|-------------------------------|
| Y41C4A.11    | 82.85        | 1852.72         | 4.483                               | 8.80743   | 280.03       | 4.99072                       |
| fipr-26      | 12.8959      | 287.166         | 4.4769                              | 354.306   | 1139.5       | 1.68534                       |
| F07A11.2     | 8.85794      | 146.459         | 4.04738                             | 32.6734   | 25.104       | -0.3802                       |
| ckb-2        | 34.2398      | 553.376         | 4.01451                             | 7.54967   | 88.8992      | 3.55769                       |
| arf-1.1      | 50.0337      | 678.781         | 3.76197                             | 8.12807   | 49.7772      | 2.6145                        |
| dpy-18       | 70.2704      | 882.4           | 3.65044                             | 56.4755   | 145.916      | 1.36945                       |
| F34H10.5     | 1.00999      | 12.6108         | 3.64225                             | 2.72327   | 7.61313      | 1.48315                       |
| ada-2        | 2.74246      | 27.9565         | 3.34964                             | 17.2959   | 10.2176      | -0.75937                      |
| gale-1       | 28.4649      | 285.154         | 3.32449                             | 17.9291   | 61.701       | 1.78299                       |
| kin-2        | 3.3106       | 32.0775         | 3.2764                              | 23.4418   | 6.86037      | -1.77272                      |
| K11H12.8     | 2.37488      | 22.1285         | 3.21998                             | 13.2433   | 10.3377      | -0.35735                      |
| fipr-24      | 1.85668      | 17.2972         | 3.21974                             | 19.198    | 33.7004      | 0.811808                      |
| H05C05.1     | 1.23418      | 11.4854         | 3.21817                             | 16.2161   | 6.08133      | -1.41497                      |
| cdr-4        | 65.2387      | 583.572         | 3.16111                             | 45.4327   | 204.253      | 2.16855                       |
| mtl-1        | 3.29887      | 28.247          | 3.09805                             | 56.9022   | 345.132      | 2.60059                       |
| srp-7        | 85.8743      | 735.028         | 3.0975                              | 101.93    | 187.225      | 0.877193                      |
| Y48B6A.25    | 12.1447      | 101.45          | 3.06237                             | 17.7771   | 64.3703      | 1.85638                       |
| ilys-2       | 4.73881      | 37.9974         | 3.0033                              | 185.467   | 200.216      | 0.110398                      |
| dnj-27       | 5.69848      | 44.4871         | 2.96474                             | 15.7771   | 12.2328      | -0.36708                      |
| F41B4.3      | 13.4883      | 100.834         | 2.9022                              | 8.67579   | 76.7894      | 3.14584                       |
| Y54G2A.18    | 221.536      | 1607.35         | 2.85907                             | 296.919   | 872.811      | 1.5556                        |
| NM_001129452 | 148.133      | 1054.82         | 2.83203                             | 72.529    | 226.795      | 1.64476                       |
| rsp-4        | 6.1332       | 43.3985         | 2.82293                             | 47.1174   | 45.549       | -0.04884                      |
| K04F10.3     | 7.01194      | 49.166          | 2.80977                             | 13.8767   | 11.4854      | -0.27285                      |
| casy-1       | 3.02905      | 20.8758         | 2.7849                              | 9.92167   | 10.2485      | 0.046754                      |
| F09A5.4      | 1.4738       | 10.0055         | 2.76318                             | 20.5683   | 8.54637      | -1.26704                      |
| ent-1        | 3.80487      | 25.7851         | 2.76062                             | 24.034    | 14.9342      | -0.68646                      |
| cyp-13A5     | 4.53486      | 30.1543         | 2.73323                             | 48.3952   | 16.6957      | -1.53539                      |
| B0507.10     | 1.31425      | 8.64721         | 2.71799                             | 3.5902    | 12.1478      | 1.75856                       |
| stim-1       | 2.46588      | 16.0843         | 2.70548                             | 16.5327   | 16.476       | -0.00496                      |
| catp-3       | 19.6269      | 119.986         | 2.61196                             | 208.459   | 154.687      | -0.43041                      |
| Y47G6A.36    | 9.32868      | 56.6107         | 2.60133                             | 36.4133   | 20.8651      | -0.80338                      |
| NM_001029208 | 1.38286      | 8.28136         | 2.58221                             | 8.51612   | 8.82427      | 0.051281                      |
| spe-29       | 1.58056      | 9.39261         | 2.57109                             | 19.267    | 20.1405      | 0.063972                      |
| T28A11.19    | 1.38678      | 8.00111         | 2.52846                             | 13.9451   | 25.0312      | 0.843964                      |
| rrf-2        | 1.33448      | 7.50177         | 2.49096                             | 2.29945   | 3.00551      | 0.386323                      |
| linc-170     | 1.34698      | 7.47041         | 2.47146                             | 10.4978   | 29.8323      | 1.50679                       |
| dnj-27       | 2.26377      | 12.5286         | 2.46842                             | 10.0862   | 7.8418       | -0.36313                      |
| F46A8.13     | 1.62447      | 8.98364         | 2.46733                             | 3.16428   | 2.47224      | -0.35606                      |
| lpr-3        | 1.67301      | 9.14895         | 2.45116                             | 31.2179   | 26.5853      | -0.23175                      |

|              |         |         |         |         |         |          |
|--------------|---------|---------|---------|---------|---------|----------|
| ilys-3       | 5.52328 | 30.1128 | 2.44678 | 77.3154 | 41.8971 | -0.88391 |
| pod-1        | 2.06277 | 11.0342 | 2.41932 | 4.09981 | 3.32951 | -0.30025 |
| cnc-4        | 37.9336 | 201.112 | 2.40646 | 1337.14 | 648.162 | -1.04472 |
| C45B2.8      | 8.86774 | 46.5351 | 2.39168 | 438.556 | 201.778 | -1.11999 |
| comt-4       | 3.49035 | 18.1996 | 2.38246 | 31.3709 | 42.9646 | 0.453723 |
| far-3        | 19.6527 | 100.024 | 2.34755 | 753.64  | 1205.38 | 0.677542 |
| K11D2.4      | 1.43154 | 7.16319 | 2.32303 | 4.26499 | 2.06856 | -1.04392 |
| Y73B3A.10    | 2.43283 | 12.0669 | 2.31035 | 2.94133 | 7.92184 | 1.42937  |
| D2085.5      | 1.08086 | 5.34499 | 2.30601 | 3.14485 | 1.30128 | -1.27306 |
| dph-2        | 3.41599 | 16.8548 | 2.30279 | 15.6197 | 4.77062 | -1.71112 |
| Y25C1A.7     | 3.44376 | 16.7495 | 2.28206 | 6.23057 | 3.58056 | -0.79918 |
| lea-1        | 10.4247 | 50.4656 | 2.2753  | 7.45417 | 5.29912 | -0.49229 |
| B0205.14     | 7.69736 | 37.1467 | 2.2708  | 6.44175 | 76.2202 | 3.56465  |
| Y36E3A.2     | 4.13458 | 19.7208 | 2.2539  | 149.005 | 127.05  | -0.22996 |
| gale-1       | 52.4278 | 248.676 | 2.24586 | 38.4284 | 79.7886 | 1.05401  |
| B0025.8      | 144.941 | 683.657 | 2.23781 | 426.38  | 876.255 | 1.03921  |
| sym-1        | 3.33435 | 15.6553 | 2.23118 | 21.5473 | 16.3617 | -0.39718 |
| hsp-4        | 189.972 | 875.271 | 2.20394 | 100.995 | 212.743 | 1.07483  |
| lit-1        | 1.41586 | 6.44713 | 2.18698 | 1.67135 | 1.21945 | -0.45478 |
| epg-9        | 3.64706 | 16.5892 | 2.18544 | 10.3564 | 9.38429 | -0.1422  |
| F54C8.7      | 8.91464 | 40.0913 | 2.16904 | 13.1359 | 19.8785 | 0.597694 |
| dlk-1        | 5.88153 | 26.3705 | 2.16466 | 20.115  | 11.3306 | -0.82805 |
| R10E4.2      | 6.71982 | 29.9384 | 2.1555  | 19.434  | 12.7721 | -0.60559 |
| tbb-6        | 22.0615 | 98.2569 | 2.15503 | 9.25639 | 133.02  | 3.84506  |
| NM_001267966 | 1.08316 | 4.77983 | 2.14172 | 9.02074 | 11.0137 | 0.287984 |
| srp-7        | 17.1572 | 74.2399 | 2.11338 | 15.0851 | 17.8648 | 0.243996 |
| T27F6.8      | 2.61149 | 11.213  | 2.10222 | 73.4378 | 34.7852 | -1.07805 |
| unc-132      | 2.2555  | 9.59739 | 2.08919 | 11.1105 | 10.6889 | -0.05581 |
| tag-320      | 190.985 | 805.918 | 2.07718 | 108.131 | 319.637 | 1.56366  |
| T14G8.3      | 41.8859 | 176.582 | 2.0758  | 25.9263 | 43.5951 | 0.749748 |
| C02F5.15     | 1.07516 | 4.48724 | 2.06128 | 1.04777 | 4.12429 | 1.97682  |
| T14G10.5     | 6.69734 | 27.7514 | 2.0509  | 28.1951 | 7.62318 | -1.88698 |
| Y41E3.8      | 112.487 | 461.884 | 2.03777 | 79.8697 | 286.892 | 1.84479  |
| W07E11.1     | 1.85615 | 7.55387 | 2.0249  | 7.14205 | 16.7914 | 1.23332  |
| C08E3.13     | 1.98659 | 8.05471 | 2.01954 | 5.82131 | 15.1217 | 1.37721  |
| B0563.9      | 2.55348 | 10.3043 | 2.0127  | 100.292 | 486.994 | 2.2797   |
| ZC239.14     | 1.20068 | 4.76369 | 1.98822 | 1.41769 | 4.18301 | 1.561    |
| ZK970.7      | 36.6141 | 144.966 | 1.98524 | 2491.92 | 1049.55 | -1.24749 |
| dur-1        | 1.2254  | 4.81994 | 1.97576 | 5.61135 | 2.83583 | -0.98458 |
| T26H5.10     | 2.43623 | 9.56535 | 1.97317 | 7.16764 | 32.3081 | 2.17233  |
| dpy-3        | 1.95075 | 7.56318 | 1.95496 | 26.4322 | 57.4506 | 1.12002  |
| hsp-3        | 320.719 | 1237.07 | 1.94754 | 172.102 | 539.185 | 1.64752  |
| C03B8.2      | 2.27926 | 8.71216 | 1.93447 | 2.22098 | 4.36636 | 0.975232 |

|              |         |         |         |         |         |          |
|--------------|---------|---------|---------|---------|---------|----------|
| T26H5.9      | 147.587 | 563.475 | 1.93279 | 1123.7  | 3168.68 | 1.49563  |
| F08B4.3      | 8.03178 | 30.4336 | 1.92187 | 9.77585 | 12.1744 | 0.316558 |
| C12D8.1      | 4.41052 | 16.6614 | 1.91749 | 8.99546 | 5.61427 | -0.6801  |
| NM_001265278 | 1.47123 | 5.5468  | 1.91464 | 7.90234 | 5.76783 | -0.45425 |
| F47A4.5      | 5.49806 | 20.7261 | 1.91446 | 24.6493 | 12.0688 | -1.03026 |
| NM_001047643 | 1.33378 | 5.01771 | 1.91151 | 2.19705 | 2.55275 | 0.216485 |
| C12D8.1      | 1.66491 | 6.25835 | 1.91033 | 4.03287 | 4.10461 | 0.025438 |
| Y49F6B.12    | 1.37092 | 5.13993 | 1.90661 | 5.51426 | 14.2626 | 1.371    |
| NM_181998    | 3.60896 | 13.2918 | 1.88088 | 12.023  | 5.86422 | -1.03579 |
| noah-2       | 2.94063 | 10.8296 | 1.88078 | 60.1741 | 35.6383 | -0.75571 |
| unc-22       | 1.72378 | 6.34375 | 1.87976 | 1.30038 | 3.07395 | 1.24116  |
| Y32B12B.2    | 3.76048 | 13.7256 | 1.86788 | 9.03128 | 5.49624 | -0.71649 |
| Y62F5A.9     | 3.46828 | 12.6406 | 1.86577 | 11.5508 | 26.9654 | 1.22311  |
| C14B9.11     | 108.019 | 392.48  | 1.86133 | 32.7191 | 72.531  | 1.14846  |
| F13B9.1      | 4.29307 | 15.5893 | 1.86047 | 3.08365 | 1.30364 | -1.2421  |
| F49E2.5      | 4.36376 | 15.5481 | 1.8331  | 8.34755 | 9.60096 | 0.201825 |
| ckb-4        | 15.2183 | 54.2145 | 1.83288 | 7.23334 | 18.8133 | 1.37902  |
| pqn-87       | 4.06484 | 14.474  | 1.83219 | 6.28664 | 8.38404 | 0.415357 |
| C14B9.2      | 56.4599 | 199.902 | 1.824   | 63.516  | 64.0179 | 0.011356 |
| F11E6.9      | 1.75116 | 6.15226 | 1.81281 | 19.7893 | 45.2353 | 1.19273  |
| pkg-2        | 1.18353 | 4.15097 | 1.81035 | 20.9113 | 2.05594 | -3.34641 |
| math-33      | 7.95681 | 27.8618 | 1.80803 | 2.36563 | 5.15814 | 1.12463  |
| cpt-3        | 1.47176 | 5.14544 | 1.80575 | 12.201  | 10.8611 | -0.16783 |
| NM_001129119 | 2.66825 | 9.25411 | 1.7942  | 13.8188 | 1.49544 | -3.20799 |
| C30H7.2      | 12.9628 | 44.8249 | 1.78992 | 47.8426 | 22.0402 | -1.11816 |
| F09B12.7     | 1.58491 | 5.48017 | 1.78982 | 6.17463 | 4.82635 | -0.35542 |
| C17D12.18    | 1.95246 | 6.72859 | 1.78501 | 3.80235 | 1.48053 | -1.36078 |
| C17H1.7      | 1.06104 | 3.64892 | 1.782   | 1.16075 | 3.14723 | 1.43903  |
| noah-1       | 2.5852  | 8.86863 | 1.77844 | 49.3673 | 25.0032 | -0.98145 |
| srap-1       | 2.79725 | 9.59465 | 1.77822 | 1.75677 | 5.13993 | 1.54882  |
| unc-73       | 1.74588 | 5.95994 | 1.77134 | 1.36422 | 1.9805  | 0.537782 |
| unc-84       | 2.08941 | 7.11168 | 1.76709 | 3.14987 | 4.65023 | 0.56201  |
| lpr-5        | 1.52801 | 5.19239 | 1.76474 | 28.6228 | 17.3173 | -0.72495 |
| linc-2       | 5.97688 | 20.2505 | 1.7605  | 58.2419 | 49.1024 | -0.24627 |
| nlp-28       | 253.445 | 856.312 | 1.75646 | 333.548 | 271.567 | -0.29659 |
| fln-2        | 1.7666  | 5.96465 | 1.75546 | 1.46695 | 3.17867 | 1.1156   |
| lpr-4        | 2.46093 | 8.30052 | 1.754   | 38.2891 | 30.7472 | -0.31648 |
