# Supplementary material
Source: PubMed Central journal article supplement (PMC4264930)
Supplement: embr0015-1278-sd9.pdf [file embr0015-1278-sd9.pdf]

Supplementary Table S3

| Gene         | Control RPKM | Control+Tm RPKM | Control/Control+Tm Log2 Fold Change | RtcB RPKM | RtcB+Tm RPKM | RtcB/RtcB+Tm Log2 Fold Change |
|--------------|--------------|-----------------|-------------------------------------|-----------|--------------|-------------------------------|
| Y41C4A.11    | 82.85        | 1852.72         | 4.483                               | 8.80743   | 280.03       | 4.99072                       |
| tbb-6        | 22.0615      | 98.2569         | 2.15503                             | 9.25639   | 133.02       | 3.84506                       |
| Y57G11B.5    | 236.653      | 339.249         | 0.519573                            | 2.78644   | 39.3928      | 3.82144                       |
| sup-6        | 6.33962      | 6.5762          | 0.052857                            | 3.08732   | 43.4372      | 3.81451                       |
| B0348.2      | 2.74467      | 3.61023         | 0.395461                            | 1.15033   | 14.4697      | 3.65292                       |
| F15B9.11     | 35.8839      | 13.3838         | -1.42285                            | 3.17625   | 39.2362      | 3.62679                       |
| B0205.14     | 7.69736      | 37.1467         | 2.2708                              | 6.44175   | 76.2202      | 3.56465                       |
| F30A10.14    | 60.334       | 75.0475         | 0.314834                            | 1.38766   | 16.363       | 3.55971                       |
| ckb-2        | 34.2398      | 553.376         | 4.01451                             | 7.54967   | 88.8992      | 3.55769                       |
| F33H12.7     | 17.1967      | 32.4593         | 0.9165                              | 8.33321   | 88.863       | 3.41464                       |
| F10D2.13     | 6.28616      | 2.14803         | -1.54916                            | 3.05938   | 28.3764      | 3.21338                       |
| cpi-2        | 203.606      | 5.24091         | -5.27982                            | 1.24931   | 11.3377      | 3.18193                       |
| Y22D7AR.10   | 99.0329      | 158.723         | 0.680535                            | 4.05364   | 36.4779      | 3.16973                       |
| F41B4.3      | 13.4883      | 100.834         | 2.9022                              | 8.67579   | 76.7894      | 3.14584                       |
| lipl-1       | 2.33782      | 1.63705         | -0.51407                            | 1.24966   | 10.6718      | 3.0942                        |
| C10G8.4      | 143.739      | 308.386         | 1.10129                             | 4.62581   | 38.5006      | 3.0571                        |
| Y48G1C.13    | 88.8999      | 90.0027         | 0.017785                            | 1.45533   | 12.0198      | 3.046                         |
| Y6B3B.5      | 9.08811      | 8.74777         | -0.05507                            | 1.49412   | 12.2979      | 3.04104                       |
| ZK813.2      | 332.046      | 426.399         | 0.360822                            | 5.05523   | 38.2248      | 2.91866                       |
| F55C12.1     | 13.1274      | 17.5474         | 0.418678                            | 6.95662   | 52.06        | 2.90372                       |
| C17H12.6     | 6.46536      | 1.86993         | -1.78975                            | 3.49709   | 26.0277      | 2.89582                       |
| F46F11.12    | 8.27405      | 1.42269         | -2.53998                            | 2.01164   | 14.0845      | 2.80767                       |
| F11A10.9     | 35.1193      | 5.92299         | -2.56786                            | 8.56523   | 58.918       | 2.78215                       |
| T23G11.12    | 244.283      | 72.1582         | -1.75932                            | 39.3134   | 266.819      | 2.76277                       |
| Y66A7A.2     | 31.5755      | 5.05242         | -2.64376                            | 3.71705   | 24.7306      | 2.73406                       |
| aldo-2       | 142.6        | 15.3751         | -3.21331                            | 2.81035   | 18.239       | 2.69821                       |
| C25G4.7      | 18.4377      | 23.154          | 0.328603                            | 2.21715   | 14.2627      | 2.68547                       |
| M01F1.4      | 2.80147      | 4.21306         | 0.588682                            | 2.81756   | 18.1146      | 2.68464                       |
| NM_001268119 | 2.73514      | 1.49331         | -0.8731                             | 1.23128   | 7.75253      | 2.65451                       |
| F32H5.3      | 9.28332      | 3.7885          | -1.29301                            | 1.77642   | 11.1447      | 2.64931                       |
| arf-1.1      | 50.0337      | 678.781         | 3.76197                             | 8.12807   | 49.7772      | 2.6145                        |
| mtl-1        | 3.29887      | 28.247          | 3.09805                             | 56.9022   | 345.132      | 2.60059                       |
| B0035.1      | 39.7476      | 10.2097         | -1.96093                            | 1.33632   | 7.86903      | 2.55792                       |
| Y53C12B.7    | 13.6557      | 11.61           | -0.23414                            | 4.64      | 26.5826      | 2.51829                       |
| F19G12.4     | 1.28959      | 3.57839         | 1.47239                             | 1.2564    | 6.90011      | 2.45732                       |
| NM_067441    | 7.84216      | 6.65054         | -0.23778                            | 4.01531   | 21.5931      | 2.42699                       |
| F40F12.9     | 8.90374      | 8.00835         | -0.15291                            | 4.52694   | 24.0639      | 2.41026                       |
| Y46G5A.38    | 2.85465      | 2.18888         | -0.38312                            | 1.60154   | 8.45318      | 2.40003                       |
| tbh-1        | 34.3064      | 53.8375         | 0.650135                            | 1.1232    | 5.79548      | 2.36731                       |
| F09E10.1     | 43.1689      | 35.6528         | -0.27598                            | 1.73117   | 8.91267      | 2.36411                       |

|              |         |         |          |         |         |         |
|--------------|---------|---------|----------|---------|---------|---------|
| NM_001128992 | 37.4695 | 51.4895 | 0.458562 | 2.46646 | 12.6275 | 2.35606 |
| rps-22       | 75.757  | 79.3202 | 0.066309 | 3.93543 | 19.4164 | 2.30268 |
| gst-38       | 13.3243 | 11.7362 | -0.18309 | 11.0917 | 54.6563 | 2.30091 |
| lir-2        | 4.73034 | 4.89576 | 0.04959  | 1.55862 | 7.6006  | 2.28584 |
| B0563.9      | 2.55348 | 10.3043 | 2.0127   | 100.292 | 486.994 | 2.2797  |
| pittr-4      | 1.6646  | 3.38919 | 1.02576  | 1.33337 | 6.45796 | 2.276   |
| F15D3.9      | 3.6163  | 5.10914 | 0.498565 | 1.76693 | 8.48904 | 2.26436 |
| T19A5.3      | 5.13578 | 1.27458 | -2.01057 | 1.32344 | 6.35432 | 2.26344 |
| T01B7.13     | 58.8105 | 69.9194 | 0.249619 | 134.553 | 642.501 | 2.25553 |
| clec-229     | 11.499  | 35.821  | 1.63929  | 15.2747 | 72.2544 | 2.24194 |
| NM_001267317 | 4.06837 | 3.18543 | -0.35297 | 4.23168 | 19.9669 | 2.23831 |
| C07H6.9      | 5.80502 | 8.56041 | 0.56038  | 2.93135 | 13.7068 | 2.22525 |
| T06A10.2     | 10.952  | 4.52081 | -1.27654 | 2.13268 | 9.94416 | 2.22118 |
| T08D10.3     | 4.81407 | 3.94785 | -0.28619 | 1.48882 | 6.86419 | 2.20493 |
| C25F9.10     | 3.16379 | 1.98019 | -0.67602 | 4.68537 | 21.5367 | 2.20056 |
| C01G10.5     | 19.2434 | 23.9906 | 0.318104 | 3.75769 | 17.1281 | 2.18845 |
| F26G1.10     | 3.68139 | 4.21519 | 0.195349 | 3.48874 | 15.8864 | 2.18702 |
| F21C10.11    | 93.681  | 201.376 | 1.10406  | 162.116 | 736.501 | 2.18366 |
| W03F11.1     | 116.64  | 180.293 | 0.628282 | 3.73107 | 16.9421 | 2.18295 |
| tsp-14       | 1.72364 | 1.34003 | -0.36319 | 2.00134 | 9.07966 | 2.18167 |
| F48G7.10     | 3.52169 | 11.747  | 1.73795  | 1.27173 | 5.76811 | 2.18131 |
| hrg-4        | 10.8091 | 3.55237 | -1.60539 | 1.26081 | 5.70622 | 2.17818 |
| T26H5.10     | 2.43623 | 9.56535 | 1.97317  | 7.16764 | 32.3081 | 2.17233 |
| cdr-4        | 65.2387 | 583.572 | 3.16111  | 45.4327 | 204.253 | 2.16855 |
| B0285.12     | 55.2587 | 26.1359 | -1.08017 | 18.1387 | 81.0753 | 2.16019 |
| Y37H2A.14    | 83.5272 | 165.201 | 0.9839   | 6.23497 | 27.483  | 2.14009 |
| F48G7.8      | 9.04005 | 16.5702 | 0.874189 | 4.62902 | 20.3809 | 2.13844 |
| Y47D7A.13    | 716.351 | 830.493 | 0.213302 | 425.952 | 1867.14 | 2.13207 |
| C01G10.4     | 48.5047 | 25.8726 | -0.9067  | 6.59139 | 28.6158 | 2.11815 |
| Y43F8B.12    | 3.64859 | 3.93883 | 0.11043  | 1.31733 | 5.6789  | 2.108   |
| nspb-1       | 17.9889 | 1.24044 | -3.85818 | 3.0017  | 12.7118 | 2.08232 |
| F09A5.4      | 11.3957 | 7.79035 | -0.54873 | 4.54091 | 19.1939 | 2.0796  |
| rpl-3        | 491.827 | 31.6821 | -3.95641 | 3.01384 | 12.6949 | 2.07457 |
| Y39B6A.3     | 5.64153 | 4.10645 | -0.4582  | 1.94722 | 8.19093 | 2.07261 |
| T13C5.6      | 19.9948 | 59.0331 | 1.5619   | 14.4034 | 59.3989 | 2.04403 |
| K02E7.6      | 2.26909 | 3.1057  | 0.452803 | 2.32332 | 9.53595 | 2.03719 |
| ZK1307.2     | 22.2208 | 21.0163 | -0.0804  | 27.2001 | 111.64  | 2.03717 |
| W08E12.2     | 24.3511 | 57.4299 | 1.23782  | 26.263  | 107.539 | 2.03376 |
| K12B6.11     | 18.006  | 8.25016 | -1.12598 | 34.4559 | 140.547 | 2.02822 |
| R12E2.15     | 3791.1  | 1692.43 | -1.16352 | 1491.4  | 6080.61 | 2.02755 |
| ZK180.5      | 12.4159 | 30.3545 | 1.28972  | 8.9214  | 36.211  | 2.02108 |
| nas-20       | 77.3446 | 70.4216 | -0.13528 | 1.10389 | 4.47941 | 2.02071 |
| B0284.6      | 6.67963 | 1.94399 | -1.78075 | 1.48678 | 5.99669 | 2.01197 |

|              |         |         |          |         |         |         |
|--------------|---------|---------|----------|---------|---------|---------|
| C16A11.2     | 5.75939 | 5.8766  | 0.029065 | 1.08757 | 4.38321 | 2.01088 |
| ZK813.3      | 469.099 | 553.46  | 0.238585 | 13.9271 | 55.5343 | 1.99549 |
| Y62H9A.15    | 15.901  | 19.0172 | 0.258193 | 25.0588 | 99.1434 | 1.9842  |
| C02F5.15     | 1.07516 | 4.48724 | 2.06128  | 1.04777 | 4.12429 | 1.97682 |
| bkip-1       | 14.1703 | 7.42638 | -0.93214 | 4.78795 | 18.7806 | 1.97177 |
| C07E3.10     | 13.0494 | 6.13201 | -1.08955 | 41.0821 | 160.464 | 1.96567 |
| NM_001269689 | 7.09429 | 14.5447 | 1.03576  | 1.62725 | 6.34064 | 1.9622  |
| C08E8.4      | 17.9963 | 47.7548 | 1.40794  | 31.5677 | 122.679 | 1.95837 |
| Y71G12B.42   | 92.9519 | 124.851 | 0.425652 | 91.2355 | 349.869 | 1.93915 |
| npax-4       | 6.28987 | 4.25915 | -0.56246 | 6.12959 | 23.48   | 1.93757 |
| C25F9.11     | 55.9461 | 37.2628 | -0.5863  | 20.616  | 78.8775 | 1.93585 |
| linc-46      | 2.07207 | 1.74418 | -0.24852 | 2.97979 | 11.3831 | 1.93361 |
| Y47D9A.1     | 3.34093 | 3.78844 | 0.181357 | 5.76972 | 21.8185 | 1.91898 |
| ttr-42       | 45.9695 | 67.9201 | 0.563163 | 5.24558 | 19.4913 | 1.89365 |
| C27D9.2      | 11.2499 | 1.36393 | -3.04406 | 7.93021 | 29.3757 | 1.88919 |
| ech-9        | 4.92153 | 4.20482 | -0.22706 | 2.16934 | 7.98859 | 1.88068 |
| F10G7.5      | 3.88727 | 4.94511 | 0.347246 | 2.14168 | 7.86454 | 1.87662 |
| NM_001129661 | 8.35433 | 13.2489 | 0.665279 | 6.07442 | 22.2086 | 1.8703  |
| swt-6        | 15.3441 | 23.4849 | 0.614051 | 40.5705 | 148.148 | 1.86853 |
| W02D7.11     | 2.20226 | 6.0853  | 1.46635  | 7.14612 | 26.0769 | 1.86754 |
| ptps-1       | 22.5356 | 7.59019 | -1.57    | 17.5586 | 63.9031 | 1.86371 |
| Y41E3.22     | 35.4646 | 20.9446 | -0.75981 | 44.3135 | 160.592 | 1.85758 |
| Y48B6A.25    | 12.1447 | 101.45  | 3.06237  | 17.7771 | 64.3703 | 1.85638 |
| K08E3.5      | 8.94868 | 9.041   | 0.014807 | 1.61447 | 5.83923 | 1.85472 |
| T01C1.4      | 7.41889 | 6.70548 | -0.14586 | 15.5129 | 56.0723 | 1.85382 |
| C08B6.6      | 1.79954 | 1.94821 | 0.114514 | 1.61353 | 5.82599 | 1.85229 |
| Y41E3.8      | 112.487 | 461.884 | 2.03777  | 79.8697 | 286.892 | 1.84479 |
| NM_001269188 | 7.25325 | 10.4508 | 0.526916 | 13.4842 | 48.3712 | 1.84288 |
| C06B3.16     | 1.13967 | 2.40459 | 1.07718  | 1.11257 | 3.99078 | 1.84277 |
| crt-1        | 922.879 | 3074.59 | 1.73618  | 603.792 | 2165.21 | 1.84239 |
| T19H5.6      | 1.44777 | 1.63284 | 0.173554 | 2.8587  | 10.2513 | 1.84238 |
| nhr-68       | 40.2685 | 13.6629 | -1.55939 | 7.8495  | 28.105  | 1.84016 |
| NM_001269803 | 1.02663 | 2.21752 | 1.11103  | 3.79723 | 13.5854 | 1.83904 |
| ZK1010.4     | 3.51358 | 1.6271  | -1.11064 | 2.65698 | 9.43311 | 1.82795 |
| NM_001047763 | 1.16701 | 2.8139  | 1.26976  | 1.15628 | 4.06852 | 1.81501 |
| Y119D3B.21   | 875.63  | 885.668 | 0.016444 | 998.8   | 3505.68 | 1.81142 |
| Y39A3CR.5    | 6.32224 | 7.76809 | 0.297125 | 5.39476 | 18.9201 | 1.81029 |
| F44G3.2      | 51.1303 | 16.162  | -1.66157 | 27.868  | 97.3941 | 1.80523 |
| R13A5.15     | 3.16354 | 3.83744 | 0.278608 | 2.98693 | 10.4049 | 1.80053 |
| F09C6.13     | 3.59321 | 7.59633 | 1.08003  | 9.02371 | 31.2337 | 1.79131 |
| C09B8.8      | 9.97813 | 5.83124 | -0.77497 | 4.74007 | 16.3587 | 1.78708 |
| cex-2        | 10.7758 | 10.6341 | -0.0191  | 7.1169  | 24.5164 | 1.78443 |
| gale-1       | 28.4649 | 285.154 | 3.32449  | 17.9291 | 61.701  | 1.78299 |

|           |         |         |          |         |         |         |
|-----------|---------|---------|----------|---------|---------|---------|
| C18C4.17  | 18.0575 | 13.9692 | -0.37035 | 37.3592 | 128.016 | 1.77679 |
| Y73B3A.18 | 4.32487 | 5.2226  | 0.272111 | 2.76152 | 9.42311 | 1.77074 |
| B0205.13  | 117.37  | 138.727 | 0.241182 | 53.5267 | 181.781 | 1.76387 |
| hen-1     | 3.78289 | 3.30753 | -0.19373 | 3.50704 | 11.8882 | 1.76121 |
| R144.15   | 137.392 | 43.7241 | -1.65179 | 47.0501 | 159.295 | 1.75943 |
| B0507.10  | 1.31425 | 8.64721 | 2.71799  | 3.5902  | 12.1478 | 1.75856 |
| col-120   | 411.256 | 130.579 | -1.65511 | 195.71  | 660.6   | 1.75506 |
| linc-71   | 3.53772 | 8.19902 | 1.21263  | 3.41263 | 11.5006 | 1.75276 |
