# Supplementary material
Source: PubMed Central journal article supplement (PMC4264930)

Supplementary Figure S2 Kosmaczewski et al.

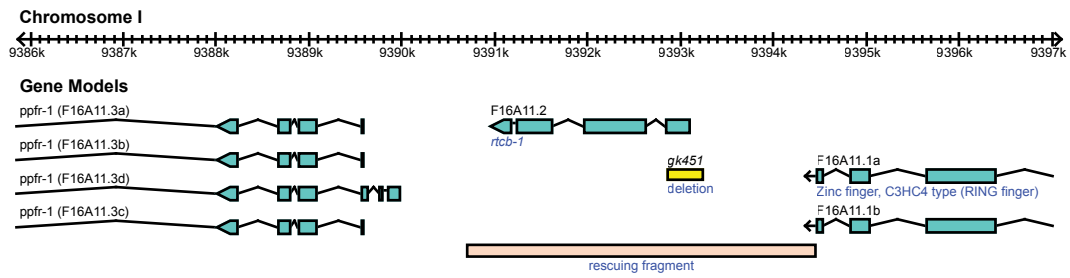

Supplement: embr0015-1278-sd2.pdf [file embr0015-1278-sd2.pdf]

Supplementary Figure S3 Kosmaczewski et al.

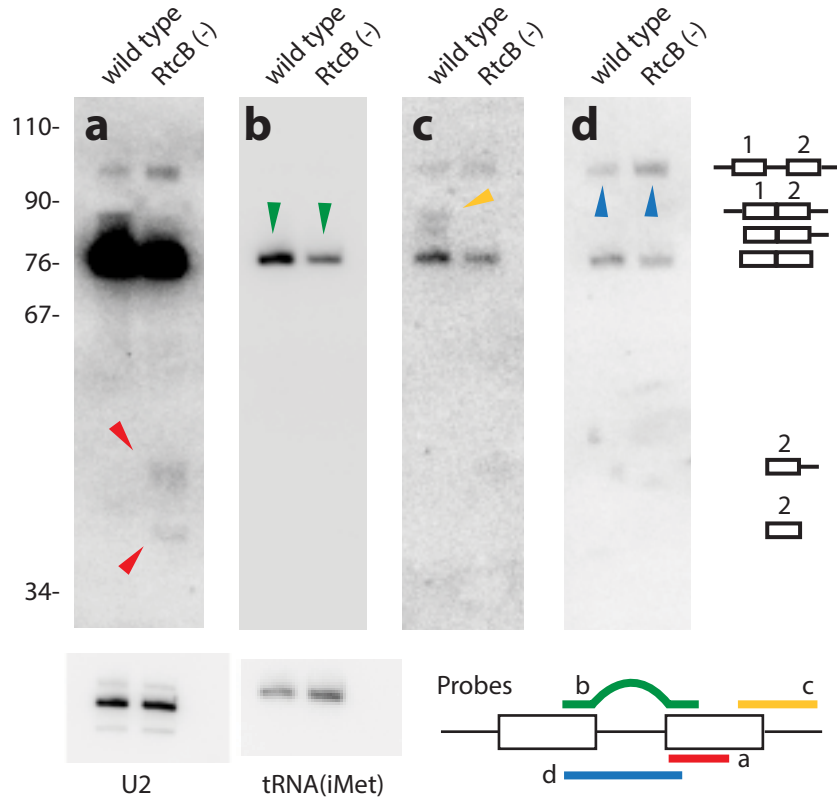

Supplement: embr0015-1278-sd3.pdf [file embr0015-1278-sd3.pdf]

Supplementary Figure S4 Kosmaczewski et al.

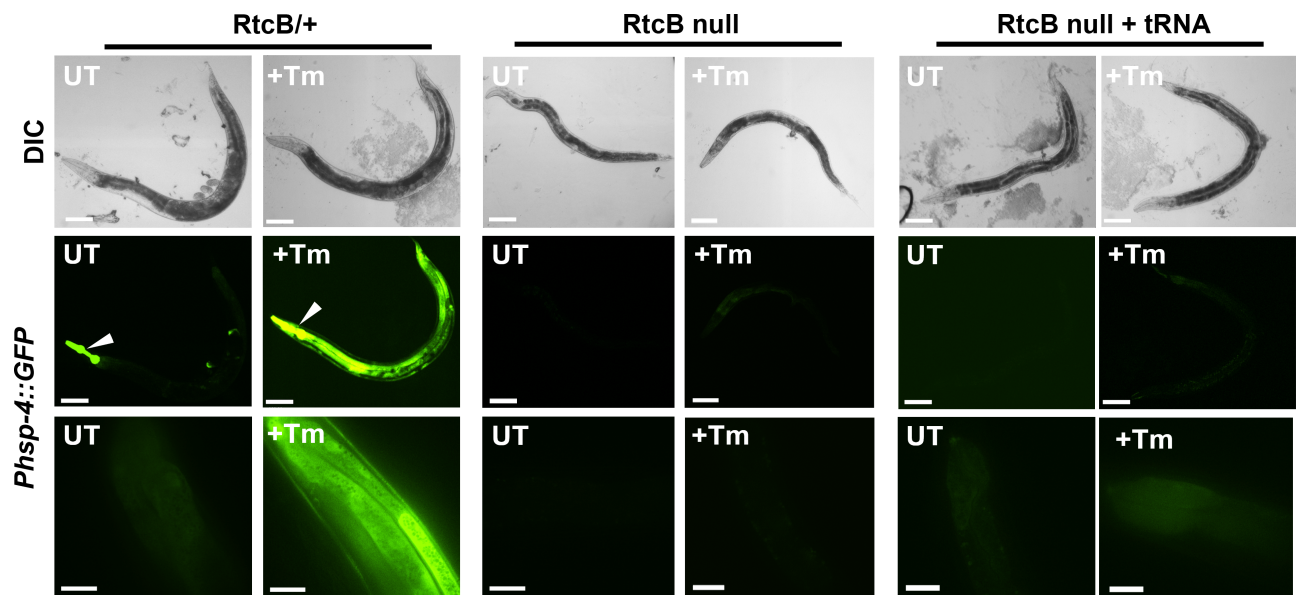

Supplement: embr0015-1278-sd4.pdf [file embr0015-1278-sd4.pdf]

Supplementary Figure S5 Kosmaczewski et al.

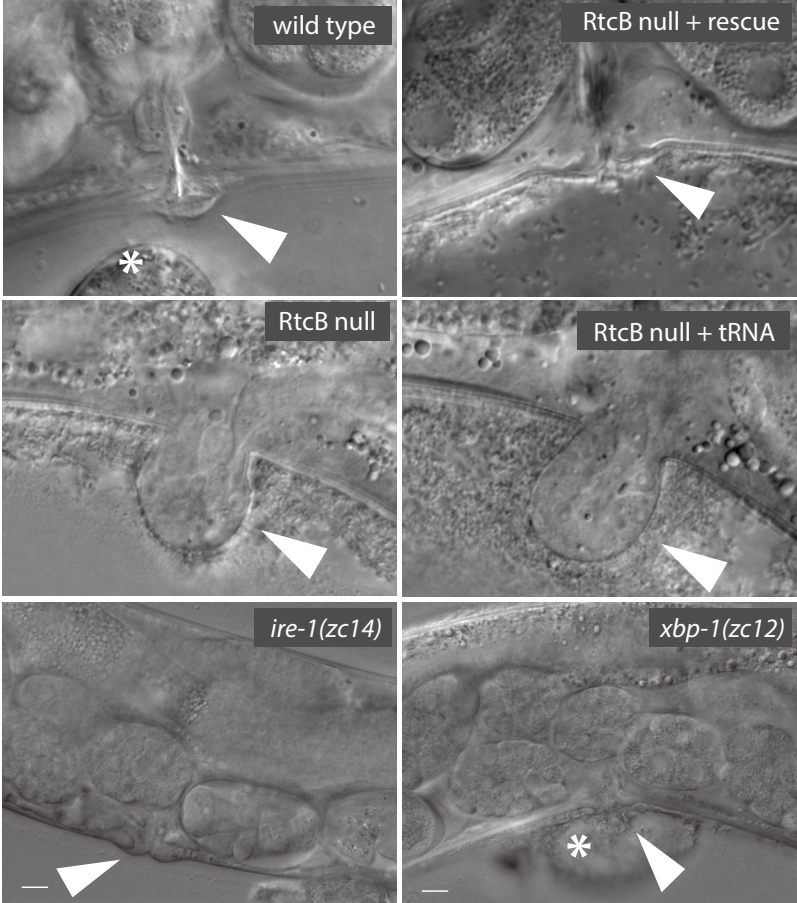

Supplement: embr0015-1278-sd5.pdf [file embr0015-1278-sd5.pdf]

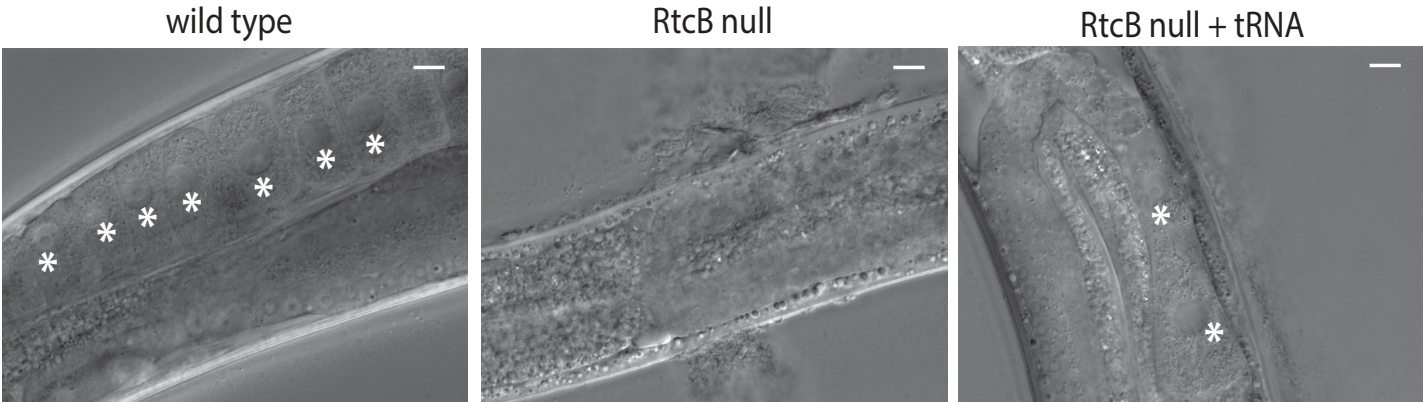

Supplement: embr0015-1278-sd6.pdf [file embr0015-1278-sd6.pdf]
